# Supplementary figures and images for: An R2R3 MYB transcription factor associated with regulation of the anthocyanin biosynthetic pathway in Rosaceae
Source: Springer Nature journal article supplement (doi:10.1186/1471-2229-10-50), 2010-03-21

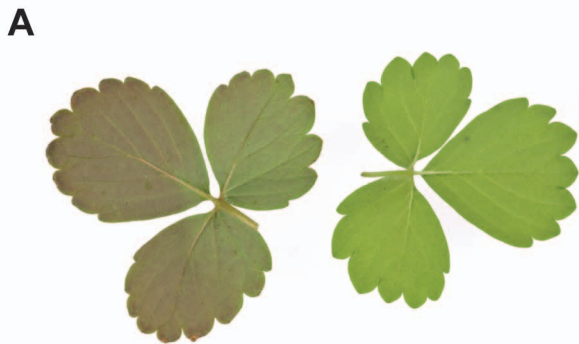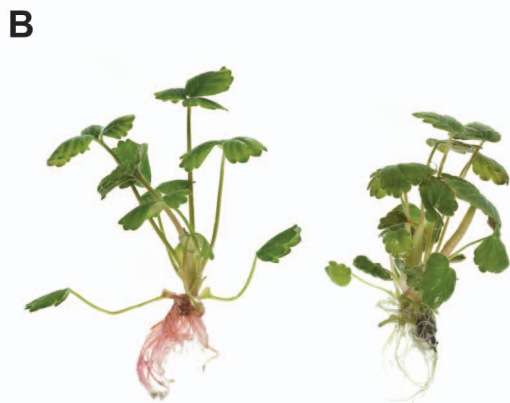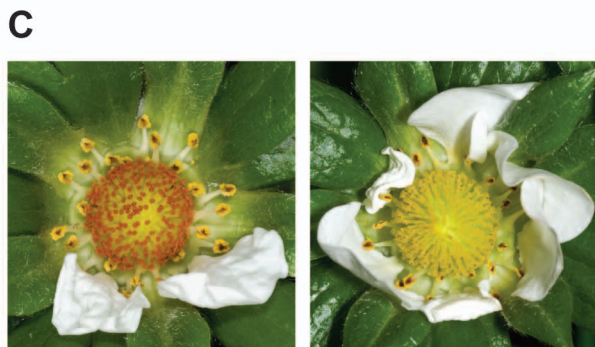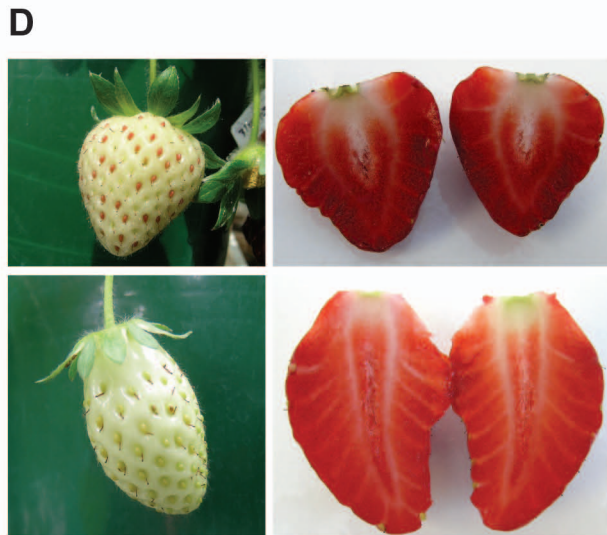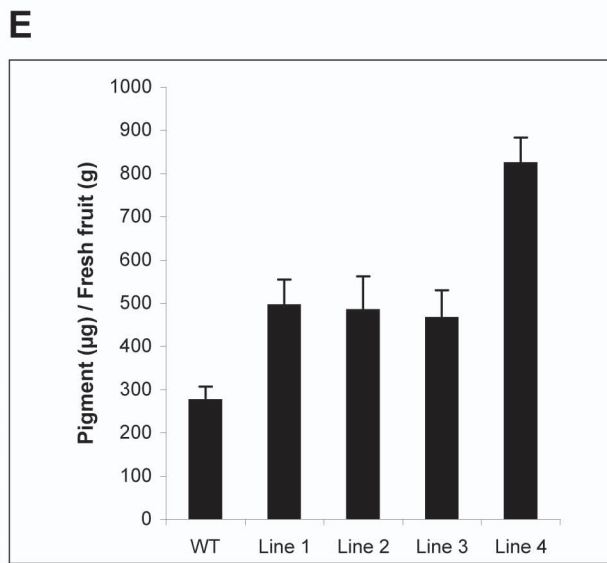

Supplement: 12870_2009_544_MOESM12_ESM.pdf [file 12870_2009_544_MOESM12_ESM.pdf]
